# Supplementary material
Source: PubMed Central journal article supplement (PMC1308905)
Supplement: pnas_0507856102_1.pdf [file pnas_0507856102_1.pdf]

Table 1. List of aberrantly spliced genes ( $p < 0.0005$ ) in *Mecp2*<sup>308/Y</sup> mice.

| Gene          | Event type            | Event description                   |
|---------------|-----------------------|-------------------------------------|
| 1110061O04Rik | Cassette exon         | NM_026849,exon18-vs-AK004345,jcn7   |
| 1700024B05Rik | Cassette exon         | NM_029322,exon3-vs-BC049649,jcn2    |
| 2310008M14Rik | Inserted exon         | AK088071,exon2-vs-NM_133984,jcn2    |
| 4933401K09Rik | Double cassette exon  | NM_181816,exons8_9-vs-AK077147,jcn4 |
| 9130022A01Rik | Cassette exon         | BC061228,exon2-vs-NM_175305,jcn1    |
| Cdk10         | Inserted intron       | BC022965,exon3-vs-NM_194446,jcn5    |
| Col2a1        | Cassette exon         | BC052326,exon5-vs-NM_031163,jcn5    |
| D7Bwg0611e    | Inserted intron       | AK083837,exon13-vs-NM_027898,jcn12  |
| Dlx5          | Terminal exon         | AF033011, exon1-vs-U67840, jcn1     |
| Elavl2        | Alternate exon 3 edge | AY035378,exon4-vs-BC046598,exon5    |
| Elf2          | Alternate exon 5 edge | AF256216,exon4-vs-NM_023502,exon4   |
| Emr1          | Cassette exon         | U66891,exon3-vs-U66892,jcn2         |
| Erp29         | Cassette exon         | BI688273,exon2-vs-NM_026129,jcn1    |
| Fgf2          | Alternate exon 3 edge | AY027557,exon1-vs-AY027559,exon1    |
| Fgf5          | Cassette exon         | NM_010203,exon2-vs-AB016516,jcn1    |
| Fut8          | Cassette exon         | BC010666,exon3-vs-NM_016893,jcn2    |
| Gp49b         | Cassette exon         | NM_013532,exon3-vs-BC065784,jcn2    |
| Gpr160        | Cassette exon         | XM_130823,exon3-vs-AB074860,jcn2    |
| Hsd17b12      | Cassette exon         | NM_019657,exon3-vs-BC037620,jcn2    |
| Itga6         | Cassette exon         | NM_008397,exon25-vs-BC058095,jcn25  |
| Lrrk1         | Cassette exon         | AK040153,exon9-vs-NM_146191,jcn2    |
| Me2           | Alternate exon 5 edge | NM_145494,exon15-vs-AK077746,exon15 |
| Nf1           | Cassette Exon         | D30730,exon5-vs-D30731,jcn4         |
| Ptgds         | Inserted intron       | BC038083,exon5-vs-NM_008963,jcn6    |
| Rab27a        | Cassette exon         | BC008173,exon2-vs-NM_023635,jcn1    |
| Rgs1          | Inserted intron       | BC052684,exon2-vs-BC028634,jcn4     |
| Rps19         | Inserted intron       | AK012052,exon5-vs-BC034506,jcn4     |
| Runx2         | Double cassette exon  | NM_009820,exons5_6-vs-AK089291,jcn2 |
| Runx2         | Cassette exon         | AF053956,exon3-vs-AK089291,jcn2     |
| Runx2         | Cassette exon         | NM_009820,exon6-vs-AF053956,jcn3    |
| Sat1          | Alternate exon 5 edge | NM_009121,exon5-vs-BI249844,exon5   |
| Slc17a3       | Cassette exon         | AK128896,exon2-vs-BF788926,jcn1     |
| Slc17a3       | Cassette exon         | NM_134069,exon2-vs-BF788926,jcn1    |
| Smr2          | Cassette exon         | U82376,exon3-vs-U82377,jcn2         |
| Sp100         | Cassette exon         | NM_013673,exon6-vs-AK080004,jcn5    |
| Srcasm        | Double cassette exon  | XM_126629,exons5_6-vs-AK009826,jcn4 |
| Surf2         | Inserted intron       | BC049779,exon3-vs-NM_013678,jcn3    |
| Tde1          | Cassette exon         | BE334506,exon2-vs-NM_012032,jcn1    |

Event type indicates the kind of event considered, whereas event description describes the EST identifier of the exon studied (numbered depending on its position in the EST) and the EST identifier of the exon-exon junction (also numbered according to its position in the EST considered).
