# Supplementary material
Source: PubMed Central journal article supplement (PMC1308905)
Supplement: pnas_0507856102_2.pdf [file pnas_0507856102_2.pdf]

Table 2. Enrichment in ACE elements in differentially spliced exons in *Mecp2*<sup>308/Y</sup> mice.

| Candidate gene       | Accession No. | Ensemble No.       | Exon      | ACEs     | Size, bp   | ACEs, per bp | ACEs, per bp X 100 |
|----------------------|---------------|--------------------|-----------|----------|------------|--------------|--------------------|
| <i>Slc17a3</i>       | NM_134069     | ENSMUST00000039721 | 1         | 1        | 37         | 0.027        | 2.703              |
|                      |               |                    | <b>2</b>  | <b>5</b> | <b>124</b> | <b>0.040</b> | <b>4.032</b>       |
|                      |               |                    | 3         | 5        | 212        | 0.024        | 2.358              |
| <i>Fgf5</i>          | NM_010203     | ENSMUST00000031280 | 1         | 1        | 577        | 0.002        | 0.173              |
|                      |               |                    | <b>2</b>  | <b>3</b> | <b>104</b> | <b>0.029</b> | <b>2.885</b>       |
|                      |               |                    | 3         | 2        | 540        | 0.004        | 0.370              |
| <i>Itga6</i>         | NM_008397     | ENSMUST00000028522 | 24        | 1        | 126        | 0.008        | 0.794              |
|                      |               |                    | <b>25</b> | <b>2</b> | <b>130</b> | <b>0.015</b> | <b>1.538</b>       |
|                      |               |                    | 26        | 12       | 540        | 0.022        | 2.222              |
| <i>Gpr160</i>        | XM_130823     | ENSMUST00000046748 | 2         | 8        | 327        | 0.024        | 2.446              |
|                      |               |                    | <b>3</b>  | <b>3</b> | <b>100</b> | <b>0.030</b> | <b>3.000</b>       |
|                      |               |                    | 4         | 6        | 476        | 0.013        | 1.261              |
| <i>Tde1</i>          | BE334506      | ENSMUST00000017851 | 1         | 0        | 134        | 0.000        | 0.000              |
|                      |               |                    | <b>2</b>  | <b>2</b> | <b>162</b> | <b>0.012</b> | <b>1.235</b>       |
|                      |               |                    | 3         | 2        | 194        | 0.010        | 1.031              |
| <i>Erp29</i>         | BI688273      | ENSMUST00000052590 | 1         | 5        | 284        | 0.018        | 1.761              |
|                      |               |                    | <b>2</b>  | <b>3</b> | <b>139</b> | <b>0.022</b> | <b>2.158</b>       |
|                      |               |                    | 3         | 3        | 480        | 0.006        | 0.625              |
| <i>1110061O04Rik</i> | NM_026849     | ENSMUST00000032403 | 17        | 5        | 180        | 0.028        | 2.778              |
|                      |               |                    | <b>18</b> | <b>4</b> | <b>156</b> | <b>0.026</b> | <b>2.564</b>       |
|                      |               |                    | 19        | 13       | 600        | 0.022        | 2.167              |
| <i>9130022A01Rik</i> | BC061228      | ENSMUST00000053419 | 1         | 2        | 105        | 0.019        | 1.905              |
|                      |               |                    | <b>2</b>  | <b>2</b> | <b>84</b>  | <b>0.024</b> | <b>2.381</b>       |
|                      |               |                    | 3         | 5        | 514        | 0.010        | 0.973              |
| <i>Runx2</i>         | NM_009820     | ENSMUST00000077846 | 5         | 2        | 105        | 0.019        | 1.905              |
|                      |               |                    | <b>6</b>  | <b>3</b> | <b>174</b> | <b>0.017</b> | <b>1.724</b>       |
|                      |               |                    | 7         | 4        | 162        | 0.025        | 2.469              |
| <i>Hsd17b12</i>      | NM_019657     | ENSMUST00000028619 | 2         | 0        | 51         | 0.000        | 0.000              |
|                      |               |                    | <b>3</b>  | <b>1</b> | <b>72</b>  | <b>0.014</b> | <b>1.389</b>       |
|                      |               |                    | 4         | 2        | 108        | 0.019        | 1.852              |

Canonical AC-rich element (ACE, derived from ref.1) were identified and their number compared in differentially spliced versus their surrounding exons. Alternative Exons are in Bold. Canonical sequence: CACCAGUCAACCGC.

Derived search sequence: Y=A or C, X=G or T in a YYYYYYYY or YYYYYYXXY string.

Similar AC elements found in ref.2.

1. Stickeler, E., Fraser, S.D., Honig, A., Chen, A.L., Bergert, S.M. & Cooper, T.A. (2001) *EMBO J.* **20**, 3821-30

2. Chandler, D.S., Qi, J. & Mattox, W. (2003) *Mol.Cell.Biol.* **23**, 5174-5181.
