# Supplementary material
Source: PubMed Central journal article supplement (PMC1308905)
Supplement: pnas_0507856102_4.pdf [file pnas_0507856102_4.pdf]

Known Genes Based on SWISS-PROT, TrEMBL, mRNA, and RefSeq

1x5

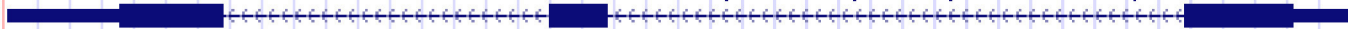

Mouse mRNAs from GenBank

U67840

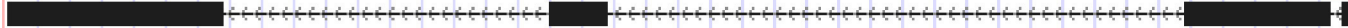

AF033011

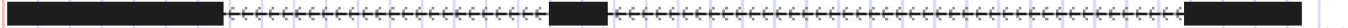

Green box

Red box
