# Supplementary material
Source: PubMed Central journal article supplement (PMC1308905)

Mutant vs wild-type

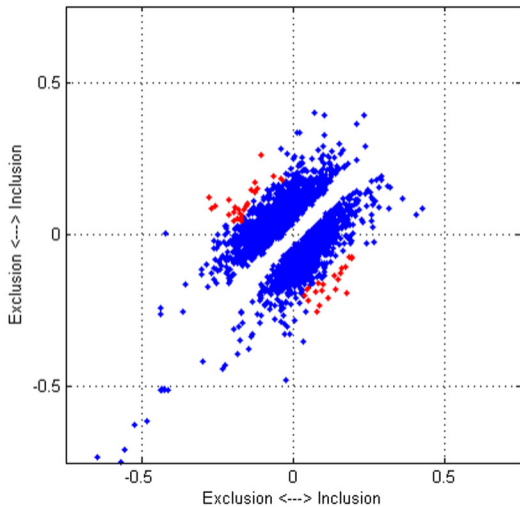

Supplement: pnas_0507856102_3.pdf [file pnas_0507856102_3.pdf]
